# Supplementary material for: Infants’ Looking to Surprising Events: When Eye-Tracking Reveals More than Looking Time
Source: PubMed Central journal article supplement (PMC5142767; doi:10.1371/journal.pone.0164277), 2016-12-07

□ 0% Container    ◻ 50% Container    ◼ 100% Container

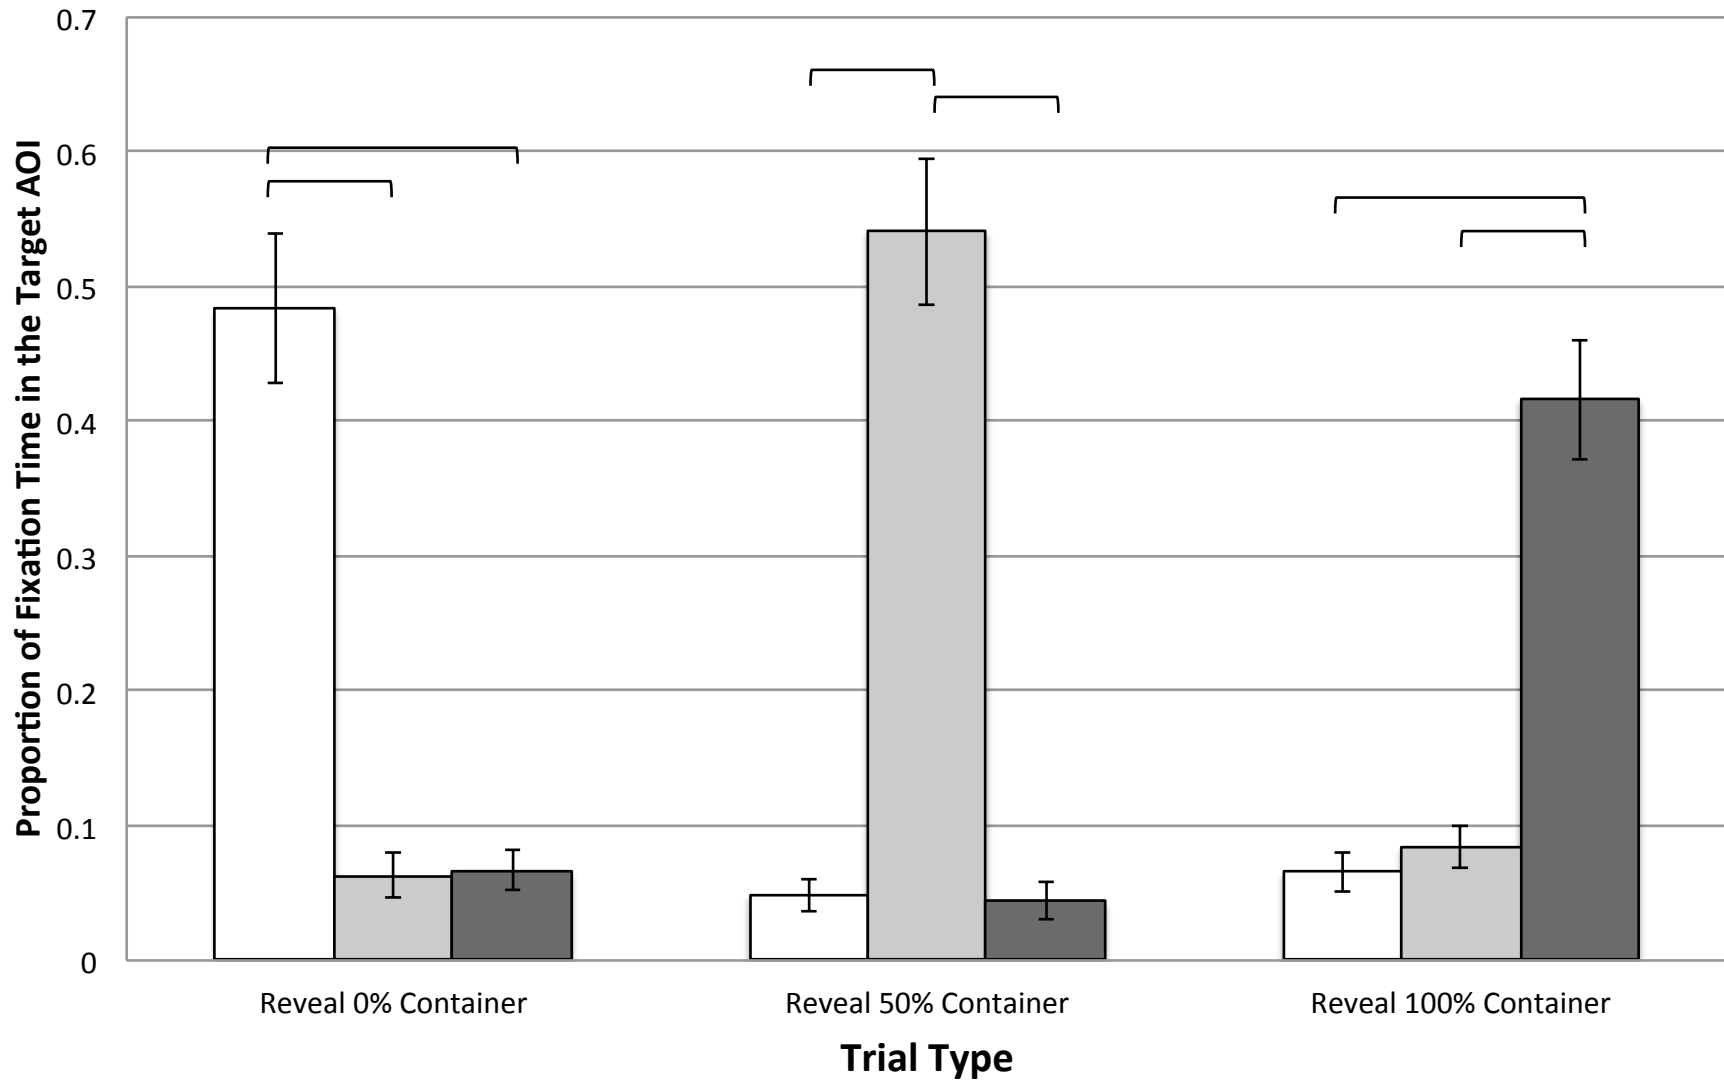

Supplement: pone.0164277.s001.pdf [file pone.0164277.s001.pdf]
